# Supplementary material for: Two decades of molecular surveillance in Senegal reveal changes in known drug resistance mutations associated with historical drug use and seasonal malaria chemoprevention
Source: PubMed Central journal article supplement — medRxiv. 2023 Apr 26:2023.04.24.23288820. Preprint. [Version 1] doi: 10.1101/2023.04.24.23288820 (PMC10168519; doi:10.1101/2023.04.24.23288820), 2023-04-26
Supplement: NIHPP2023.04.24.23288820v1-supplement-1.pdf [file NIHPP2023.04.24.23288820v1-supplement-1.pdf]

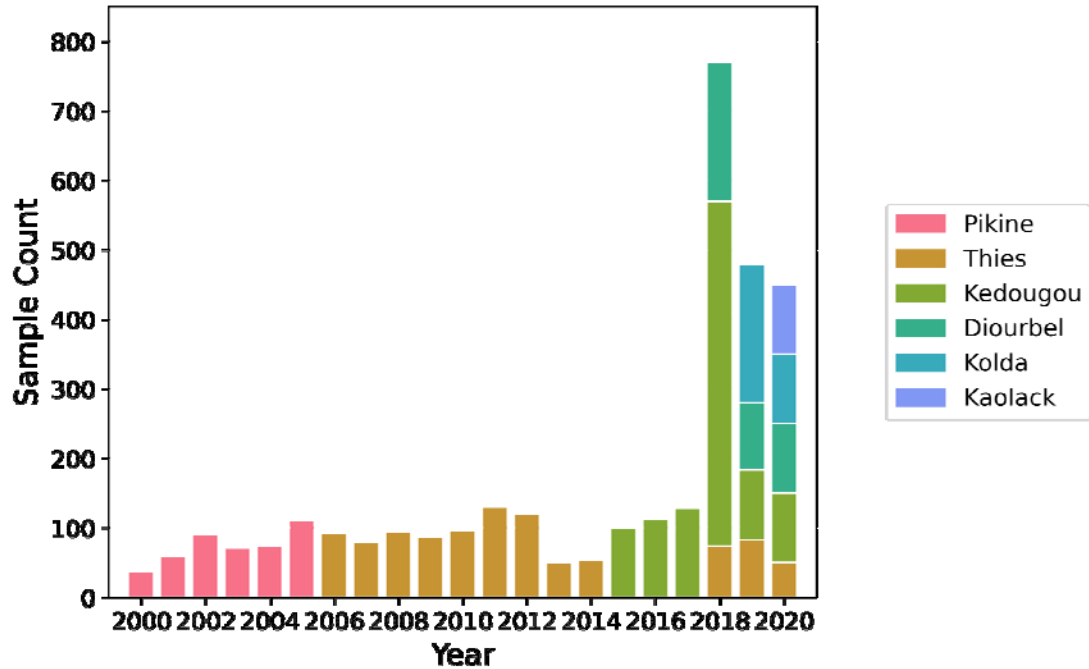

528

529 **Fig S1. Sample sizes for SNP-based molecular surveillance.** Sample size per year per  
 530 region for the SNP-based molecular surveillance.

531

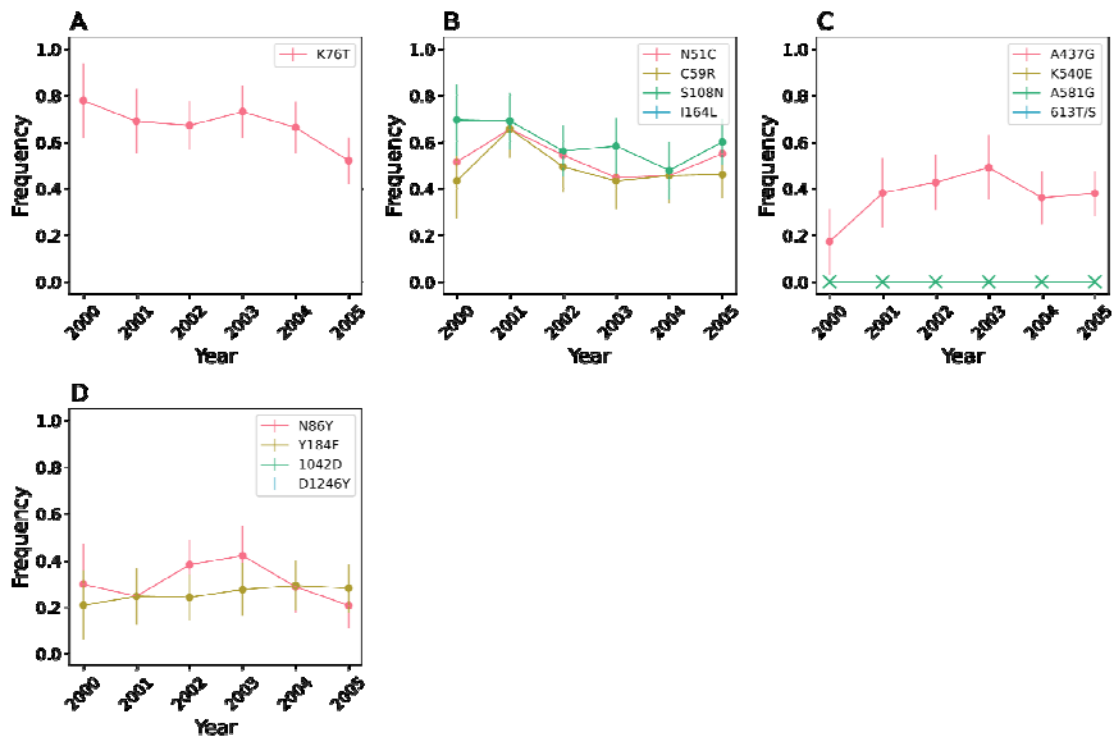

532

533 **Fig S2. SNP-based molecular surveillance in Pikine** for A) *Pfcrtr*, B) *Pfdhfr*, C) *Pfdhps* and  
534 D) *Pfmdr1*. The *Pfkelch13* SNPs were not examined in Pikine. Error bars indicate two  
535 binomial standard deviations from the mean. X's denote years where samples were collected  
536 but the mutation was not observed. Gaps in the data were because samples were not  
537 collected for that year.

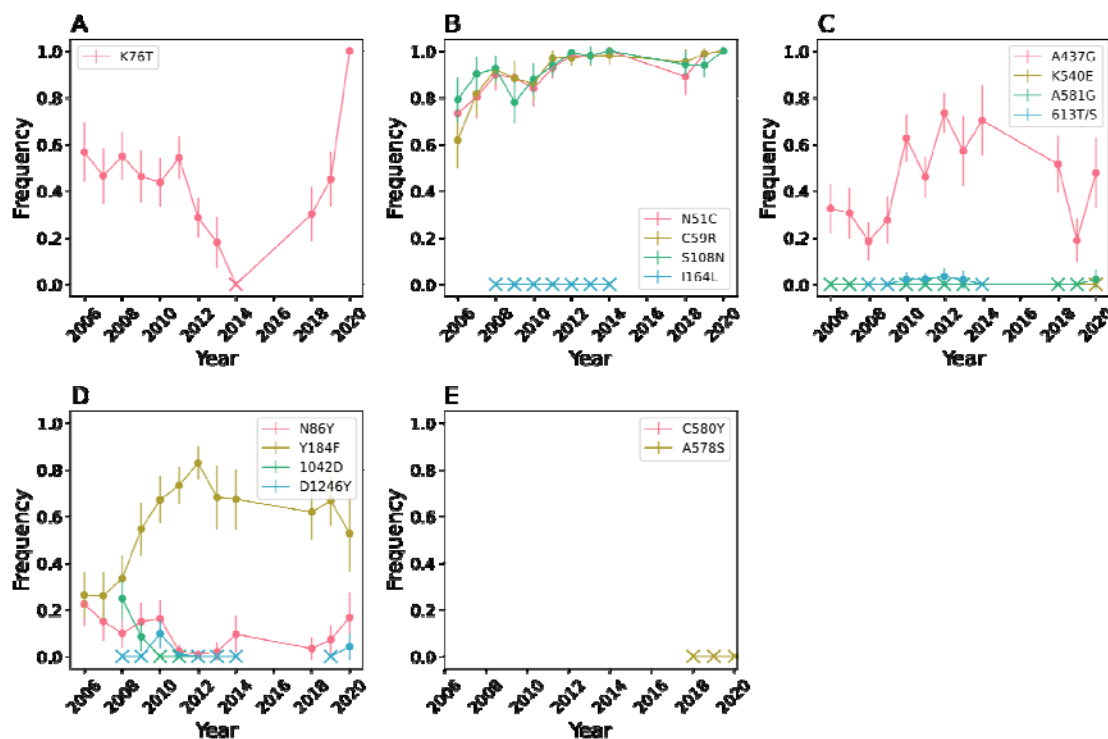

538

539 **Fig S3. SNP-based molecular surveillance in Thies** for A) *Pfcrtr*, B) *Pfdhfr*, C) *Pfdhps* and  
540 D) *Pfmdr1*, and E) *Pfkelch13*. Error bars indicate two binomial standard deviations from the  
541 mean. X's denote years where samples were collected but the mutation was not observed.  
542 Gaps in the data were because samples were not collected for that year.

543

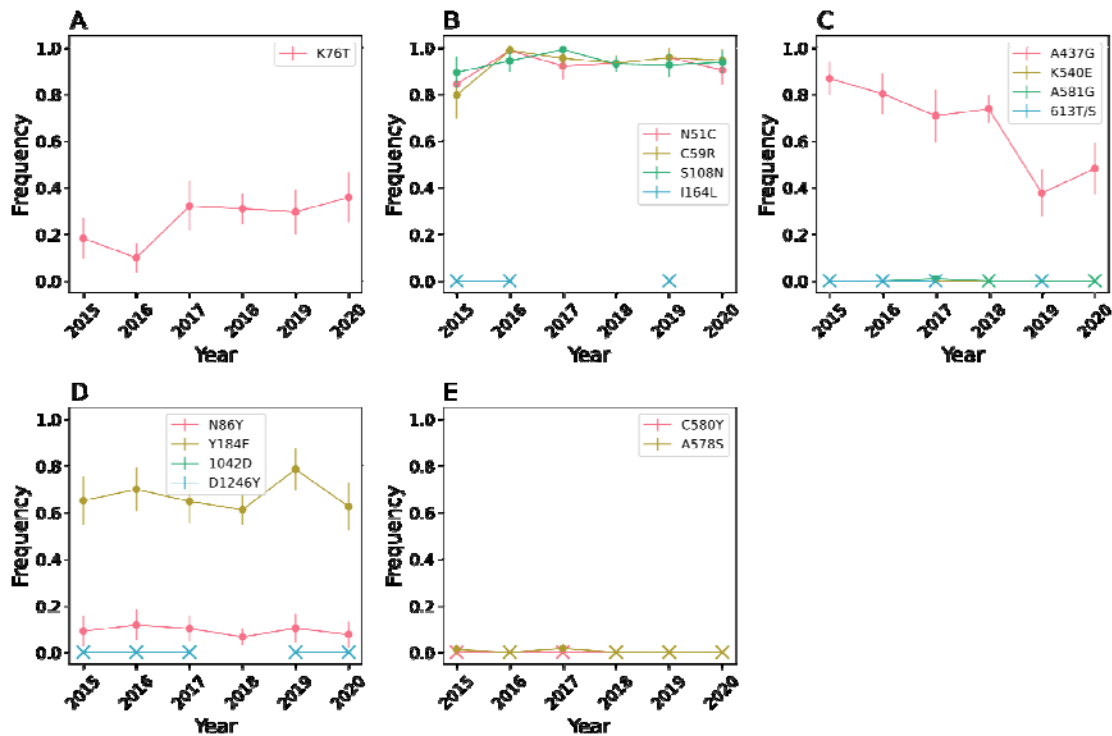

544

545 **Fig S4. SNP-based molecular surveillance in Kedougou for A) *Pfcrtr*, B) *Pfdhfr*, C)**  
 546 *Pfdhps*, D) *Pfmdr1*, and E) *Pfkelch13*. Error bars indicate two binomial standard deviations  
 547 from the mean. X's denote years where samples were collected but the mutation was not  
 548 observed. Gaps in the data were because samples were either not collected or not  
 549 genotyped for that year.

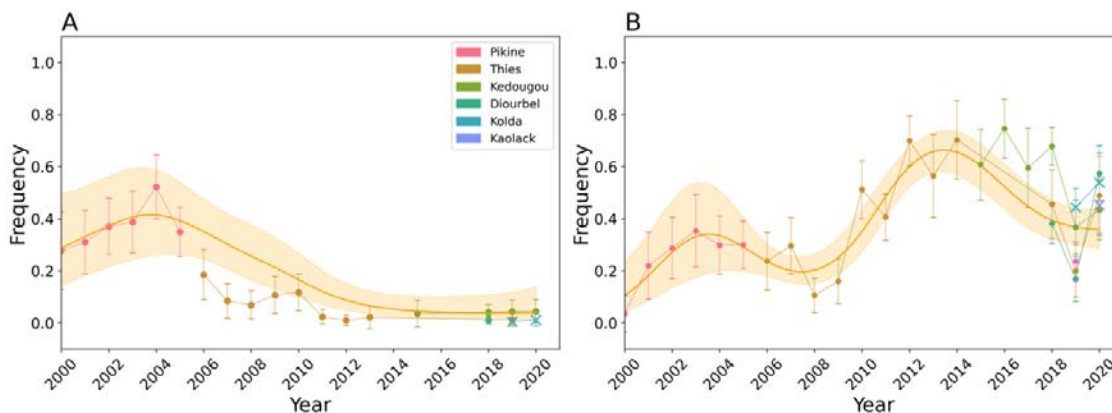

550

551 **Fig S5. A)** Frequency of *Pf dhfr* triple sensitive (N51, C59, S108) parasites. **B)** Frequency of  
 552 “quadruple” (*Pf dhfr* triple mutant + *Pfdhps* A437G) parasites. The scatterplots show the  
 553 observed frequencies and their 95% binomial confidence interval. Model predictions from a  
 554 calibrated generalized additive model and the 95% confidence intervals are shown in orange.  
 555 The model was calibrated with data from Pikine, Thiès, Diourbel, and Kedougou (denoted

556 with circles). The data from Kolda and Kaolack (denoted with X) were not used for model  
557 calibration.

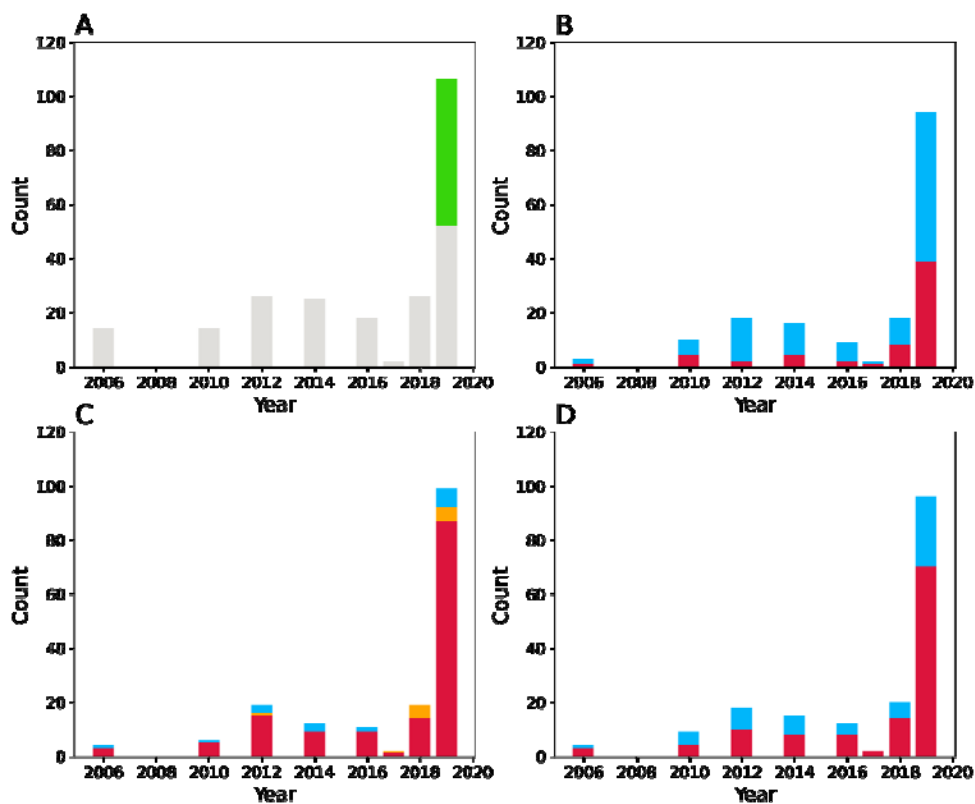

558  
559 **Fig S6 Sampling distribution for our whole genome sequence collection (A).** Grey  
560 indicates the sample came from Thiès. Green indicates the sample came from Kedougou.  
561 Sampling distributions for **B)** the *Pfcr* genomic region, **C)** the *Pfdhfr* genomic region, and **D)**  
562 the *Pfdhps* genomic regions. For **B** and **D**, blue denotes samples with the sensitive allele and  
563 red indicates those with the resistance allele. For **C**, red denotes samples that are *Pfdhfr*  
564 triple mutant, blue indicates those that are *Pfdhfr* triple sensitive, and orange indicates those  
565 with a mix of resistant and sensitive alleles at the three examined *Pfdhfr* loci.  
566  
567

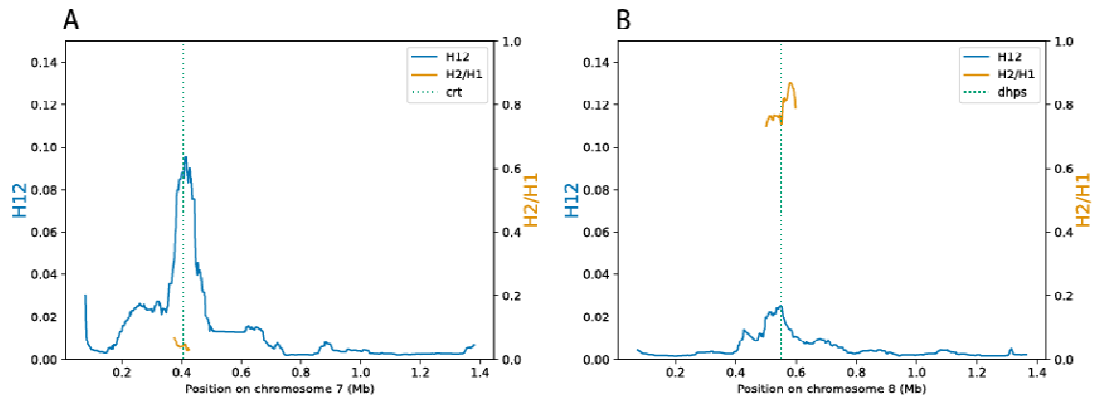

568  
569  
570  
571  
572

**Fig S7 Evidence of Hard and Soft Sweeps** H12 (*blue*, left y-axis) and H2/H1 (*orange*, right y-axis) statistics for **A)** chromosome 7 and **B)** chromosome 8. The dotted green lines show the location of *Pfcrt* or *Pfdhps*.

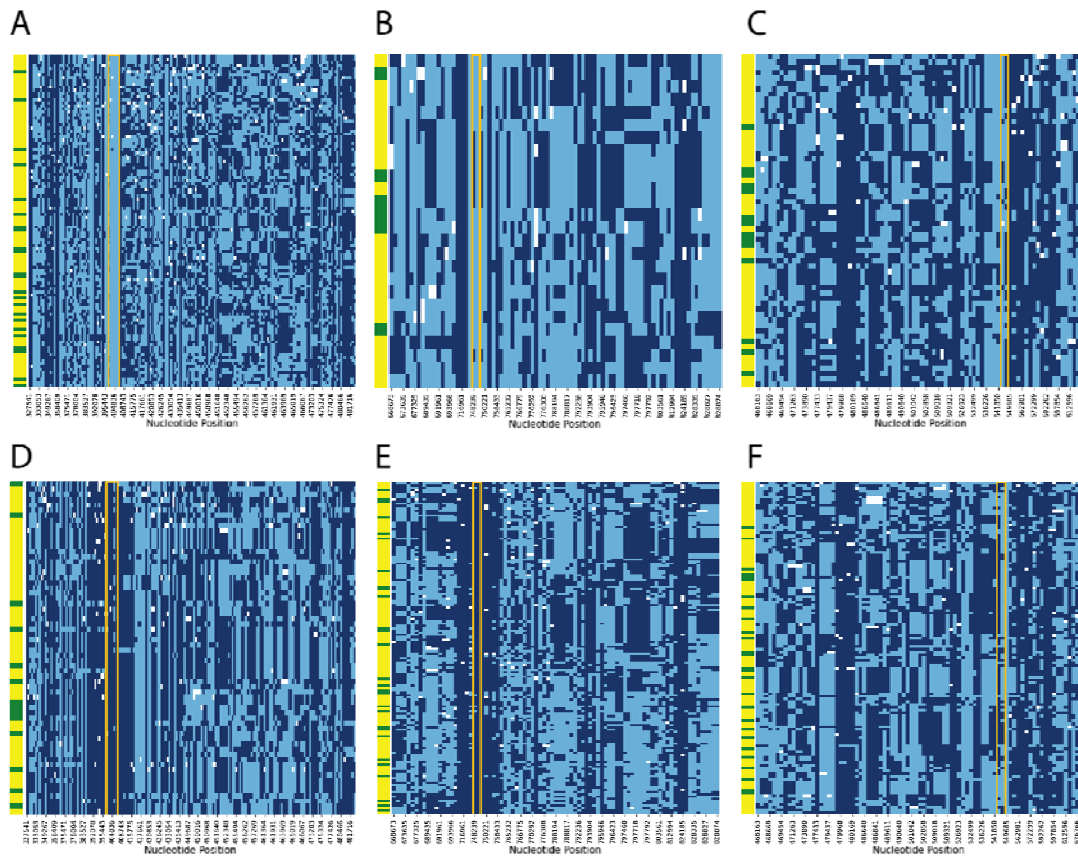

573

**Fig S8. SNPs used to define genomic haplotypes.** Genomic haplotypes surrounding the wild-type mutations: **A)** *Pfcrt* K76, **B)** *Pfdhfr* C59, **C)** *Pfdhps* A437 and the drug resistance mutations: **D)** *Pfcrt* K76T, **E)** *Pfdhfr* C59R, **F)** *Pfdhps* A437G. Each row represents a sample. The left most column indicates whether the sample was collected before 2014 (*green*) or

577

578 after 2014 (*yellow*). Alleles corresponding to the 3D7 reference are indicated by *light blue*  
579 and alleles corresponding to the alternative allele are indicated by *dark blue*. White  
580 corresponds to missing data. The orange boxes highlight the boundaries of the *Pfcr* (**A/D**),  
581 *Pfdhfr* (**B/E**), and *Pfdhps* (**C/F**) genes,

582  
583  
584  
585
